# Supplementary material
Source: PubMed Central journal article supplement (PMC3135840)
Supplement: supp_44_6_777__1.pdf [file supp_44_6_777__1.pdf]

Online Data Supplement

**Role of Breast Regression Protein (BRP)-39  
in the Pathogenesis of Cigarette Smoke-Induced  
Inflammation and Emphysema**

Hiroshi Matsuura, M. Sci.<sup>1</sup>, Dominik Hartl, M.D.<sup>1</sup>, Min-Jong Kang, M.D., Ph.D.<sup>1</sup>, Charles S. Dela Cruz, M.D., Ph.D.<sup>1</sup>, Barbara Koller M.D.<sup>1</sup>, Geoffrey L Chupp, M.D.<sup>1</sup>, Robert J. Homer, M.D., Ph.D.<sup>2</sup>, Yang Zhou Ph.D.<sup>1</sup>, Won-Kyung Cho, M.D.<sup>1</sup>, Jack A. Elias, M.D.<sup>1</sup>, Chun Geun Lee, M.D., Ph.D.<sup>1,3</sup>

<sup>1</sup>Section of Pulmonary and Critical Care Medicine

<sup>2</sup>Department of Pathology  
Yale University School of Medicine  
Department of Internal Medicine  
300 Cedar Street (TAC S441)  
P.O. Box 208057  
New Haven, CT 06520-8057  
Telephone (203) 785-4119

<sup>3</sup>Corresponding Author

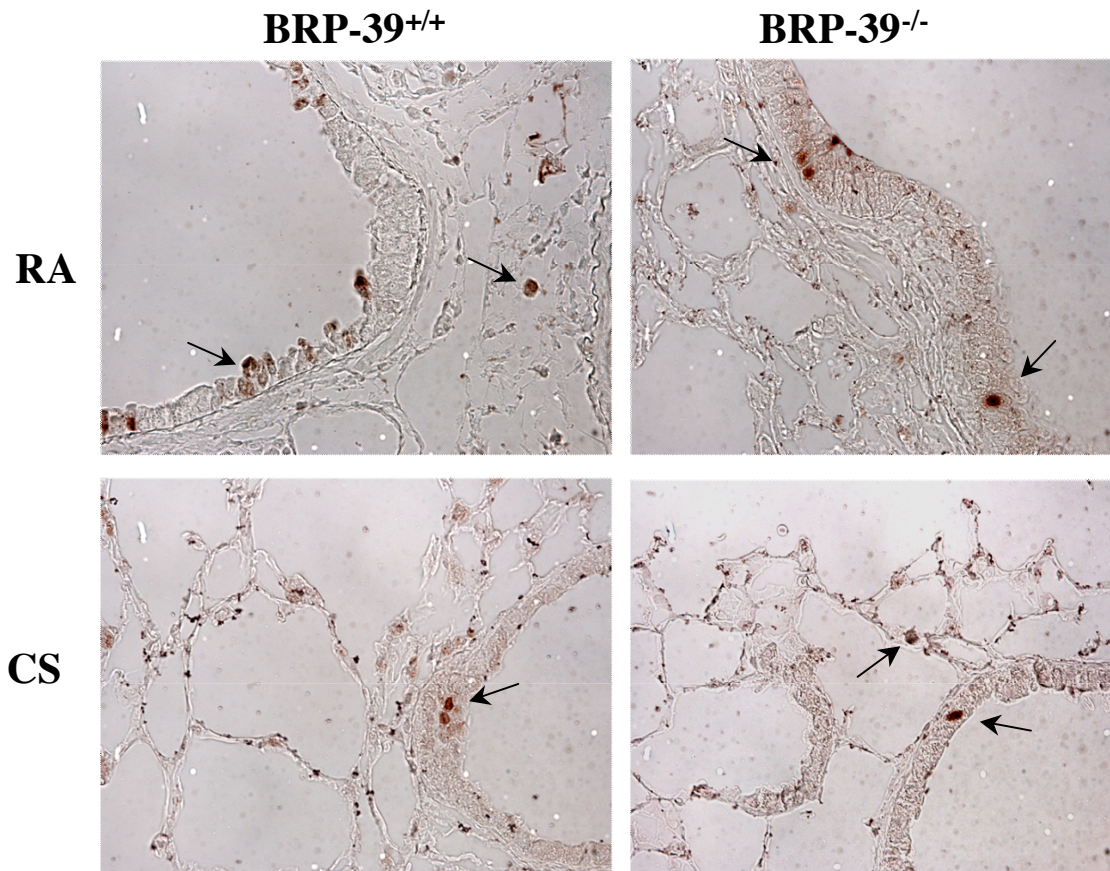

**Figure E1.** Role of BRP-39 in epithelial cell proliferation after CS-exposure. 2 month-old wild type and BRP-39 null mice (BRP-39<sup>-/-</sup>) were exposed RA or CS for 2 weeks. 5-Bromo-2-Deoxyuridine (BrdU, Sigma, St Louis, MO) was delivered to the mice via i.p. injection (1mg/mouse, 7 days and 6 hours before sacrifice) during the course of CS or RA exposure, then the mice were sacrificed and the BrdU labeled-cells in the lung were detected using BrdU *In Situ* Detection Kit II (BD Bioscience, San Diego, CA). Arrows indicate BrdU positive cells. 20x of original magnification.
